# Supplementary material for: Vasodilatory Effects and Mechanisms of Action of Bacopa monnieri Active Compounds on Rat Mesenteric Arteries
Source: PubMed Central journal article supplement (PMC6630913; doi:10.3390/molecules24122243), 2019-06-15
Supplement: molecules-24-02243-s001.pdf [file molecules-24-02243-s001.pdf]

## Supplementary documents

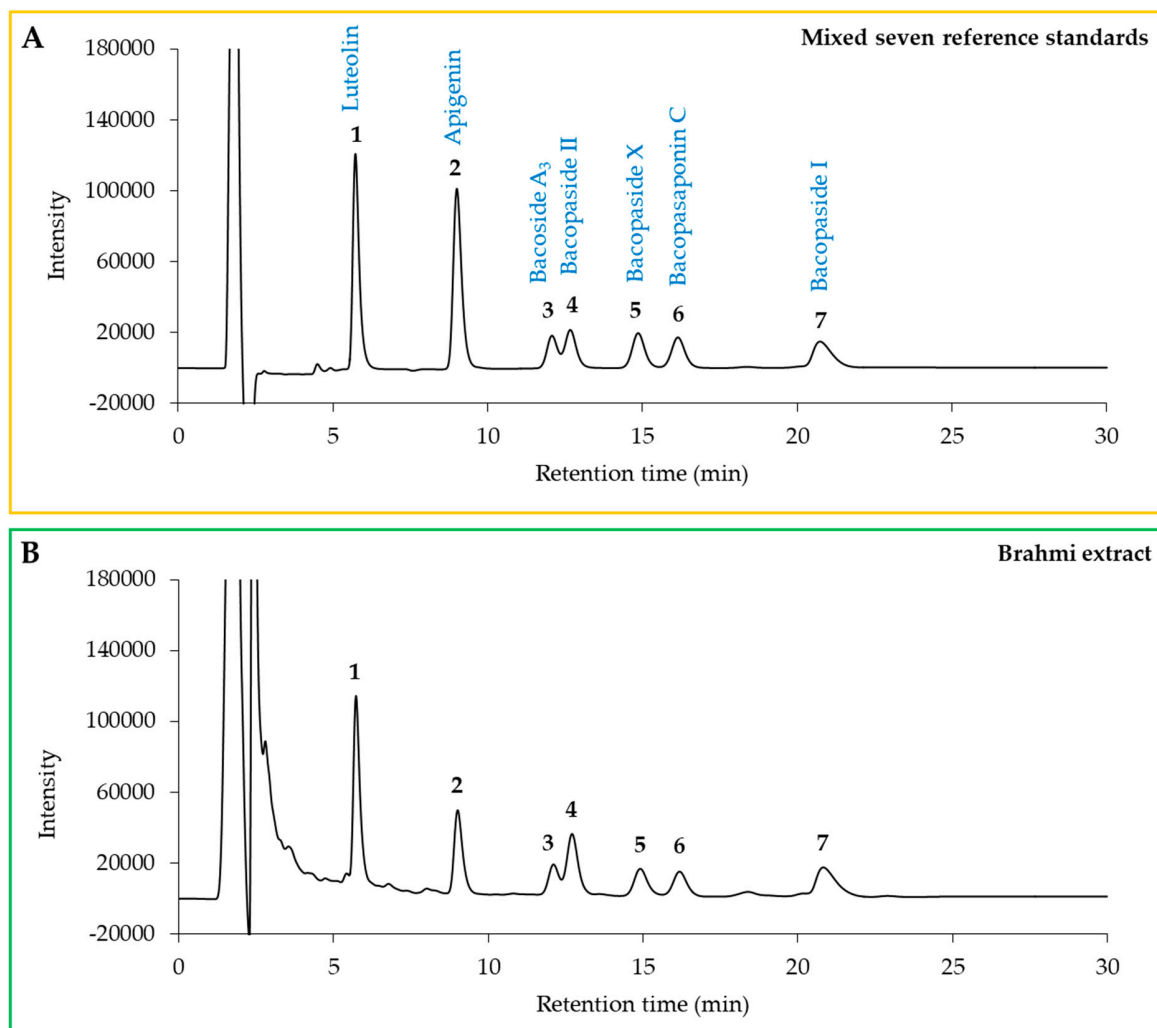

**Figure S1.** Representative HPLC-UV chromatogram of mixed seven standards at 20 µg/ml for 1 and 2 and 100 µg/ml for 3–7 (A) and Brahmi extract (2 mg/ml) (B); luteolin (1), apigenin (2), bacoside A<sub>3</sub> (3), bacopaside II (4), bacopaside X (5), bacopasaponin C (6) and bacopaside I (7). The HPLC method followed the previous report [1].

**Table S1.** Amount of each compound in 95% ethanolic extract of Brahmi analyzed by HPLC. The values are expressed as averages from triplicate experiments ± standard deviations.

| Compound                | Amount (mg/g of dried extract) |
|-------------------------|--------------------------------|
| Luteolin                | 1.39 ± 0.07                    |
| Apigenin                | 0.77 ± 0.06                    |
| Bacoside A <sub>3</sub> | 9.16 ± 0.13                    |
| Bacopaside II           | 15.63 ± 0.53                   |
| Bacopaside X            | 7.07 ± 0.36                    |
| Bacopasaponin C         | 8.19 ± 0.38                    |
| Bacopaside I            | 10.69 ± 0.19                   |

Total flavonoids ~2.1 mg/g; total saponins ~51 mg/g

## References

1. Saesong, T.; Temkitthawon, P.; Nangngam, P.; Ingkaninan, K., Pharmacognostic and physico-chemical investigations of the aerial part of *Bacopa monnieri* (L.) Wettst. *SJST* **2019**, *41*, 397-404.
